# Supplementary material for: Adipose Tissue Dysfunction Signals Progression of Hepatic Steatosis Towards Nonalcoholic Steatohepatitis in C57Bl/6 Mice
Source: PubMed Central journal article supplement — Diabetes. 2010 Sep 21;59(12):3181–91. doi: 10.2337/db10-0224 (PMC2992781; doi:10.2337/db10-0224), 2010-09-21
Supplement: supp_db10-0224_DB100224onlineappendix.pdf [file supp_db10-0224_DB100224onlineappendix.pdf]

## Supplemental Table 1: Gene Set Enrichment Analysis

### Pathways upregulated in LFH, HFL and HFH compared to LFL

|                                                       | LFH vs LFL |       | HFL vs LFL |          | HFH vs LFL |          |
|-------------------------------------------------------|------------|-------|------------|----------|------------|----------|
|                                                       | NES        | FDR q | NES        | FDR q    | NES        | FDR q    |
| VALINE_LEUCINE_AND_ISOLEUCINE_DEGRADATION             | 2.3        | 0     | 2.4        | 0        | 2.6        | 0        |
| MITOCHONDRIAL_FATTY_ACID_OXIDATION                    | 2.2        | 0     | 2.6        | 0        | 2.5        | 0        |
| MISCELLANEOUS_LIPID_METABOLISM                        | 2.1        | 0.01  | 1.9        | 0.01     | 2.4        | 0        |
| BENZOATE_DEGRADATION_VIA_COA_LIGATION                 | 2.0        | 0.02  | 1.6        | 0.09     | 1.9        | 0.01     |
| PROPANOATE_METABOLISM                                 | 1.9        | 0.03  | 2.3        | 0        | 2.5        | 0        |
| PEROXISOMAL_FATTY_ACID_OXIDATION                      | 1.9        | 0.03  | 2.3        | 0        | 2.2        | 0        |
| LIPOGENESIS                                           | 1.9        | 0.03  | 1.5        | 0.13     | 2.0        | 3.56E-03 |
| MM_NUCLEAR_RECEPTORS_IN_LIPID_METABOLISM_AND_TOXICITY | 1.9        | 0.03  | 1.8        | 0.02     | 1.8        | 0.02     |
| NUCLEAR_RECEPTORS_IN_LIPID_METABOLISM_AND_TOXICITY    | 1.8        | 0.04  | 1.8        | 0.02     | 1.8        | 0.02     |
| MM_AMINO_ACID_METABOLISM                              | 1.8        | 0.04  | 1.9        | 0.01     | 1.8        | 0.01     |
| MM_KREBS-TCA_CYCLE                                    | 1.8        | 0.05  | 1.8        | 0.01     | 2.0        | 3.18E-03 |
| NICOTINATE_AND_NICOTINAMIDE_METABOLISM                | 1.8        | 0.05  | 1.6        | 0.05     | 2.0        | 3.71E-03 |
| PANTOTHENATE_AND_COA_BIOSYNTHESIS                     | 1.8        | 0.05  | 1.8        | 0.02     | 1.5        | 0.14     |
| CITRATE_CYCLE_(TCA_CYCLE)                             | 1.7        | 0.06  | 2.0        | 2.08E-03 | 2.3        | 0        |
| GLYCAN_STRUCTURES_-_DEGRADATION                       | 1.7        | 0.07  | 1.4        | 0.22     | 2.1        | 8.00E-04 |
| MM_FATTY_ACID_BETA_OXIDATION_META_BIGCAT              | 1.7        | 0.08  | 2.0        | 3.05E-03 | 2.2        | 0        |
| PPAR_SIGNALING_PATHWAY                                | 1.7        | 0.10  | 1.9        | 0.01     | 1.8        | 0.02     |
| FATTY_ACID_METABOLISM                                 | 1.6        | 0.11  | 2.3        | 0        | 2.2        | 2.46E-04 |
| ALANINE_AND_ASPARTATE_METABOLISM                      | 1.6        | 0.12  | 1.8        | 0.02     | 1.7        | 0.05     |
| MM_MITOCHONDRIAL_FATTY_ACID_BETAOXIDATION             | 1.6        | 0.12  | 2.2        | 7.21E-04 | 2.2        | 5.22E-04 |
| LIMONENE_AND_PINENE_DEGRADATION                       | 1.6        | 0.14  | 1.5        | 0.15     | 1.9        | 0.01     |
| MM_FATTY_ACID_BETA_OXIDATION_1_BIGCAT                 | 1.5        | 0.14  | 1.8        | 0.01     | 2.0        | 3.73E-03 |

### Pathways upregulated exclusively in HFH compared to LFL

|                                                      | LFH vs LFL |       | HFL vs LFL |       | HFH vs LFL |          |
|------------------------------------------------------|------------|-------|------------|-------|------------|----------|
|                                                      | NES        | FDR q | NES        | FDR q | NES        | FDR q    |
| CHOLESTEROL_SYNTHESIS_ESTERIFICATION                 | 0.8        | 1     | 1.3        | 0.26  | 2.1        | 5.80E-04 |
| NRF2-REGULATED_GENES_COMBINED                        | 0.8        | 1     | -0.9       | 0.89  | 2.0        | 3.98E-03 |
| CELL_CYCLE                                           | -0.7       | 1     | 0.7        | 1     | 1.9        | 0.01     |
| ATM_SIGNALING_PATHWAY                                | 1.2        | 0.50  | -0.8       | 0.98  | 1.9        | 0.01     |
| CELL_COMMUNICATION                                   | 0.8        | 1     | -1.3       | 0.49  | 1.8        | 0.01     |
| CYCLINS_AND_CELL_CYCLE_REGULATION                    | -0.5       | 1.00  | -0.8       | 0.97  | 1.8        | 0.02     |
| PYRIMIDINE_METABOLISM                                | 0.8        | 1     | 1.1        | 0.58  | 1.8        | 0.02     |
| MM_2-TISSUES-BLOOD_AND_LYMPH                         | 0.9        | 0.97  | -0.9       | 0.89  | 1.8        | 0.02     |
| HOW_PROGESTERONE_INITIATES_THE_OOCYTE_MATURATION     | 1.2        | 0.59  | 1.0        | 0.79  | 1.7        | 0.03     |
| PURINE_METABOLISM                                    | 1.2        | 0.60  | 1.2        | 0.54  | 1.7        | 0.03     |
| P53_SIGNALING_PATHWAY                                | -0.6       | 1     | -1.2       | 0.59  | 1.7        | 0.04     |
| MM_2-TISSUES-MUSCLE_FAT_BONE_AND_CONNECTIVE          | 1.3        | 0.49  | 1.3        | 0.26  | 1.6        | 0.08     |
| MM_MATRIX_METALLOPROTEINASES                         | -0.8       | 1     | -1.4       | 0.42  | 1.6        | 0.08     |
| SEL_EXPR_OF_CHEMOKINE_RECEPTORS_DURING_T-CELL_POLAR. | 0.8        | 1     | -0.9       | 0.93  | 1.6        | 0.08     |
| TNFR1_SIGNALING_PATHWAY                              | -1.0       | 1     | 0.7        | 1.00  | 1.6        | 0.08     |
| MM_CELL_CYCLE-G1_TO_S_CONTROL_REACTOME               | -0.9       | 1     | 0.8        | 1     | 1.6        | 0.08     |
| MM_PROSTAGLANDIN_SYNTHESIS_REGULATION                | 0.9        | 0.91  | -1.0       | 0.75  | 1.5        | 0.09     |
| MM_CELL_CYCLE_KEGG                                   | -0.9       | 1     | 0.8        | 1     | 1.5        | 0.10     |
| MM_OXIDATIVE_STRESS                                  | 0.5        | 1     | -1.0       | 0.78  | 1.5        | 0.11     |
| OXIDATIVE_STRESS_INDUCED_GENE_EXPRESSION_VIA_NRF2    | 1.1        | 0.74  | 0.7        | 1     | 1.5        | 0.13     |
| ST_TUMOR_NECROSIS_FACTOR_PATHWAY                     | 0.7        | 1     | -0.8       | 0.97  | 1.5        | 0.13     |
| AMINOSUGARS_METABOLISM                               | 0.7        | 1     | -0.7       | 1     | 1.5        | 0.14     |
| CELL_CYCLE_G2_M_CHECKPOINT                           | -0.5       | 1     | 0.9        | 0.89  | 1.4        | 0.14     |
| OXIDATIVE_PHOSPHORYLATION                            | 0.9        | 0.91  | 1.0        | 0.84  | 1.4        | 0.15     |
| ASCORBATE_AND_ALDARATE_METABOLISM                    | 0.7        | 1     | 1.2        | 0.48  | 1.4        | 0.15     |
| MM_1-TISSUE-INTERNAL_ORGANS                          | 1.4        | 0.37  | 1.0        | 0.79  | 1.4        | 0.22     |
| FAS_SIGNALING_PATHWAY_(CD95_)                        | -0.9       | 1     | 1.0        | 0.85  | 1.4        | 0.21     |
| MM_HYPERTROPHY_MODEL                                 | 1.0        | 0.86  | 1.0        | 0.89  | 1.4        | 0.21     |
| MM_WNT_SIGNALING                                     | 1.0        | 0.87  | 1.0        | 0.87  | 1.4        | 0.23     |
| ECM-RECEPTOR_INTERACTION                             | -1.0       | 1     | -1.4       | 0.43  | 1.4        | 0.23     |
| NUCLEOTIDE_SUGARS_METABOLISM                         | 0.9        | 0.99  | -0.5       | 1     | 1.3        | 0.24     |

**Supplemental Table 2:** *Regression coefficients of the association between plasma levels of selected proteins and final liver triglyceride content.* Regression coefficients were generated using multivariate analysis. Statistically significant associations (inverse RSD>2) are shown in red. All other proteins analyzed did not show any significance.

|                | Week  |       |       |       |       |       |       |
|----------------|-------|-------|-------|-------|-------|-------|-------|
|                | 0     | 2     | 4     | 8     | 12    | 16    | 20    |
| CRP            | 0.39  | 0.45  | 0.72  | 1.17  | 1.91  | 2.05  | 1.90  |
| Haptoglobin    | 0.35  | 0.46  | 0.56  | 1.13  | 1.67  | 2.09  | 1.93  |
| Leptin         | 0.38  | 0.53  | 0.57  | 1.27  | 1.80  | 2.39  | 2.21  |
| MIP-1 $\alpha$ | 0.20  | 0.29  | 0.27  | 0.68  | 0.91  | 1.30  | 1.20  |
| Eotaxin        | -0.29 | -0.31 | -0.60 | -0.83 | -1.48 | -1.39 | -1.29 |
| IL-18          | 0.26  | 0.36  | 0.39  | 0.86  | 1.22  | 1.61  | 1.49  |
| IL-1 $\beta$   | 0.29  | 0.42  | 0.40  | 0.98  | 1.34  | 1.88  | 1.74  |
| MIP-1 $\gamma$ | 0.21  | 0.27  | 0.35  | 0.67  | 1.01  | 1.22  | 1.12  |
| MIP-1          | 0.15  | 0.21  | 0.23  | 0.50  | 0.71  | 0.95  | 0.88  |
| MDC            | -0.22 | -0.22 | -0.46 | -0.60 | -1.11 | -0.99 | -0.92 |
| TIMP-1         | 0.16  | 0.23  | 0.22  | 0.53  | 0.72  | 1.02  | 0.94  |
| Insulin        | 0.12  | 0.24  | 0.03  | 0.50  | 0.45  | 1.09  | 1.01  |
| MPO            | 0.28  | 0.36  | 0.44  | 0.89  | 1.32  | 1.63  | 1.51  |
| GCP-2          | -0.19 | -0.19 | -0.41 | -0.52 | -0.98 | -0.85 | -0.79 |
